# Supplementary material for: The metabolite alpha-ketobutyrate extends lifespan by promoting peroxisomal function in C. elegans
Source: PubMed Central journal article supplement (PMC9842765; doi:10.1038/s41467-023-35899-1), 2023-01-16
Supplement: 41467_2023_35899_MOESM2_ESM.pdf [file 41467_2023_35899_MOESM2_ESM.pdf]

## **Description of Additional Supplementary Files**

**File name: Supplementary Data 1**

**Description:** Statistical analyses of lifespan experiments.

**File name: Supplementary Data 2**

**Description:** List of primers used for qRT-PCR assays.
